# Supplementary material for: Association between climate variables and pulmonary tuberculosis incidence in Brunei Darussalam, 2001 - 2018
Source: Research Square preprint supplement (doi:10.21203/rs.3.rs-964660/v1), 2021-10-19
Supplement: Supplementary file 1 [file a4c7b6068badbc9e22418eb6.docx]

**Supplementary Information**

**Title:** Association between climate variables and pulmonary tuberculosis incidence in Brunei Darussalam, 2001 – 2018

Liling Chaw1, Sabrina Q.R. Liew2, Justin Wong3

1PAPRSB Institute of Health Sciences, Universiti Brunei Darussalam

2College of Human Ecology, Cornell University, United States of America

3Disease Control Division, Ministry of Health, Brunei Darussalam

S1 Table. Spearman’s rank correlation test results.

| Variables | Average wind speed | Total sunshine | Total rainfall | Minimum RH | Mean RH | Maximum RH | Vapour pressure | Minimum temp | Average temp | Maximum temp | PTB cases |
| --- | --- | --- | --- | --- | --- | --- | --- | --- | --- | --- | --- |
| Average wind speed | 1 |  |  |  |  |  |  |  |  |  |  |
| Total sunshine hours | -0.01 | 1 |  |  |  |  |  |  |  |  |  |
| Total rainfall | 0.05 | **-0.26** | 1 |  |  |  |  |  |  |  |  |
| Minimum RH | **0.13** | **-0.3** | **0.38** | 1 |  |  |  |  |  |  |  |
| Mean RH | 0.06 | **-0.33** | **0.49** | **0.79** | 1 |  |  |  |  |  |  |
| Maximum RH | **-0.16** | **-0.13** | **0.46** | **0.53** | **0.68** | 1 |  |  |  |  |  |
| Vapour pressure | **-0.13** | **0.25** | **0.04** | **0.23** | **0.43** | **0.34** | 1 |  |  |  |  |
| Minimum temperature | 0.02 | **0.34** | **-0.35** | -0.04 | **-0.08** | **-0.1** | **0.65** | 1 |  |  |  |
| Average temperature | **-0.17** | **0.57** | **-0.42** | **-0.52** | **-0.49** | **-0.32** | **0.51** | **0.7** | 1 |  |  |
| Maximum temperature | **-0.22** | **0.45** | **-0.32** | **-0.77** | **-0.59** | **-0.35** | **0.25** | **0.39** | **0.82** | 1 |  |
| PTB counts | -0.04 | 0.01 | 0.02 | 0.03 | **0.09** | **0.07** | **0.11** | 0.05 | 0.04 | 0.04 | 1 |

RH = Relative Humidity; Bold values indicates that p < 0.05

S1 Fig. Three-dimensional lag-response curves from separate univariate models, for (top left to right) average wind speed, minimum temperature, total rainfall, and (bottom left to right) total sunshine hours and mean relative humidity


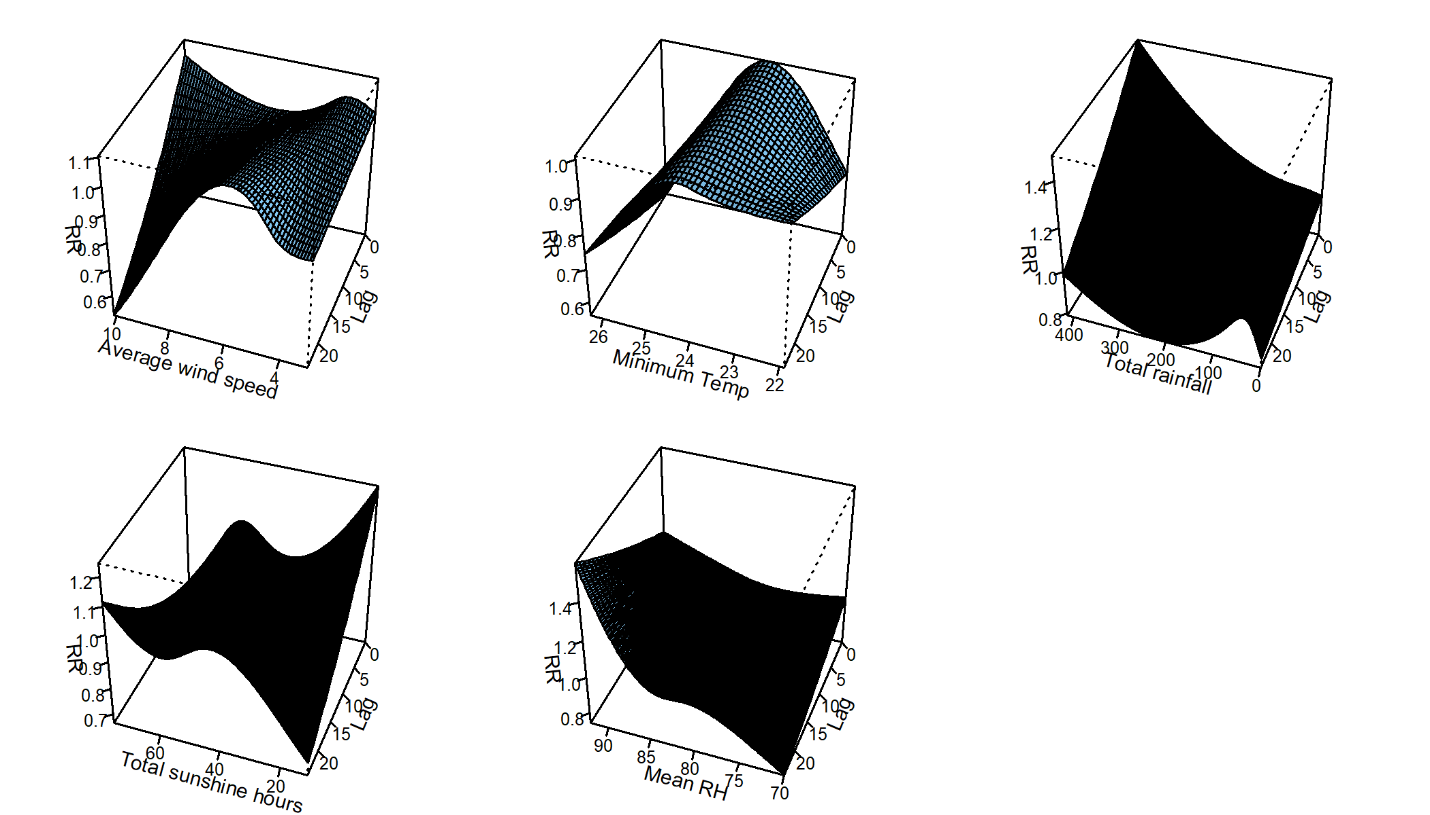


S2 Table. Results for univariate models

| Climate variables | 10th percentile | | 90th percentile | |
| --- | --- | --- | --- | --- |
| value | RR | value | RR |
| Average wind speed | 3.7 | 0.49 (0.08, 2.98) | 5.4 | 1.61 (0.29, 8.78) |
| Total rainfall | 4.5 | 0.12 (0.01, 1.17) | 134.6 | 0.15 (0.02, 1.30) |
| Total sunshine hours | 34.5 | 0.53 (0.11, 2.64) | 62.8 | 0.43 (0.10, 1.91) |
| Minimum RH | 56 | 0.40 (0.07, 2.30) | 68.6 | 3.95 (0.86, 18.25) |
| Mean RH | 77.7 | 0.42 (0.05, 3.37) | 86.6 | **5.70 (1.16, 28.03)** |
| Maximum RH | 92.9 | 0.27 (0.02, 3.77) | 99 | 7.89 (0.97, 64.25) |
| Vapour pressure | 29.4 | 0.18 (0.02, 1.45) | 32.7 | 2.84 (0.39, 20.53) |
| Minimum temperature | 23.2 | 0.50 (0.08, 3.01) | 24.8 | **0.18 (0.04, 0.73)** |
| Average temperature | 26.8 | 0.44 (0.09, 2.15) | 28.6 | 0.20 (0.04, 1.05) |
| Maximum temperature | 30.9 | 0.43 (0.08, 2.45) | 33.4 | 0.43 (0.09, 2.04) |

RH = Relative Humidity

S3 Table. Results for multivariate model, version excluding average wind speed.

| Climate variables | 10th percentile | | 90th percentile | |
| --- | --- | --- | --- | --- |
| value | Adjusted RR | value | Adjusted RR |
| Minimum temperature | 23.2 | 1.06 (0.14, 8.26) | 24.8 | **0.17 (0.03, 0.91)** |
| Total rainfall | 4.5 | 0.78 (0.06, 10.5) | 134.6 | **0.03 (0.002, 0.38)** |
| Total sunshine hours | 34.5 | **0.10 (0.02, 0.65)** | 62.8 | 0.58 (0.12, 2.85) |
| Mean RH | 77.7 | 0.39 (0.04, 5.09) | 86.6 | **51.5 (5.53, 479.01)** |

RH = Relative Humidity

S4 Table. Results for multivariate model, using natural cubic splines of 5 degrees of freedom for long-term trend.

| Climate variables | 10th percentile | | 90th percentile | |
| --- | --- | --- | --- | --- |
| value | Adjusted RR | value | Adjusted RR |
| Average wind speed | 3.7 | 0.38 (0.08, 1.72) | 5.4 | 1.40 (0.34, 5.87) |
| Minimum temperature | 23.2 | 0.29 (0.06, 1.51) | 24.8 | 0.58 (0.16, 2.09) |
| Total rainfall | 4.5 | 0.91 (0.14, 6.07) | 134.6 | **0.10 (0.01, 0.89)** |
| Total sunshine hours | 34.5 | **0.23 (0.06, 0.94)** | 62.8 | 1.66 (0.46, 6.07) |
| Mean RH | 77.7 | 0.46 (0.06, 3.73) | 86.6 | **10.4 (1.52, 71.83)** |

RH = Relative Humidity

S5 Table. Results for multivariate model, using natural cubic splines of 9 degrees of freedom for long-term trend.

| Climate variables | 10th percentile | | 90th percentile | |
| --- | --- | --- | --- | --- |
| value | RR | value | RR |
| Average wind speed | 3.7 | 0.59 (0.07, 5.18) | 5.4 | 6.86 (0.80, 58.71) |
| Minimum temperature | 23.2 | 2.15 (0.21, 22.05) | 24.8 | **0.06 (0.01, 0.46)** |
| Total rainfall | 4.5 | 9.80 (0.44, 216.78) | 134.6 | 0.29 (0.02, 5.13) |
| Total sunshine hours | 34.5 | 0.20 (0.02, 1.57) | 62.8 | 0.46 (0.07, 2.95) |
| Mean RH | 77.7 | 0.32 (0.02, 5.68) | 86.6 | **50.9 (3.96, 653.37)** |

RH = Relative Humidity
